# Supplementary material for: Preferred WMSA catalytic mechanism of the nucleotidyl transfer reaction in human DNA polymerase κ elucidates error-free bypass of a bulky DNA lesion
Source: Oxford University Press journal article supplement (doi:10.1093/nar/gks653), 2012-07-05
Supplement: gks653_Supplementary_Data.zip [file gks653_Supplementary_Data.zip]

Archive with 4 entries (4 files):
- Movie_S2_Step_2.mp4
- Movie_S1_Step_1.mp4
- Movie_S3_BP.mp4
- Supplemental_Information.pdf
